# Supplementary material
Source: Springer Nature journal article supplement (https://www.springermedizin.de/resource/supplementary/12911_2009_302_MOESM5_ESM.pdf/9525454)

**Distribution of the number of sentences**

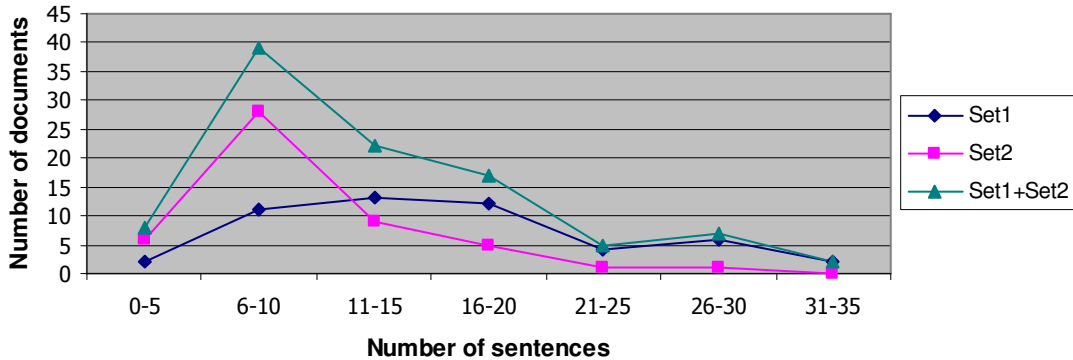

Supplement: MOESM5 [file 9525454]
